# Supplementary material for: Antithrombotic/Antiplatelet Treatment in Transcatheter Structural Cardiac Interventions—PFO/ASD/LAA Occluder and Interatrial Shunt Devices
Source: PubMed Central journal article supplement (PMC6568033; doi:10.3389/fcvm.2019.00075), 2019-06-07

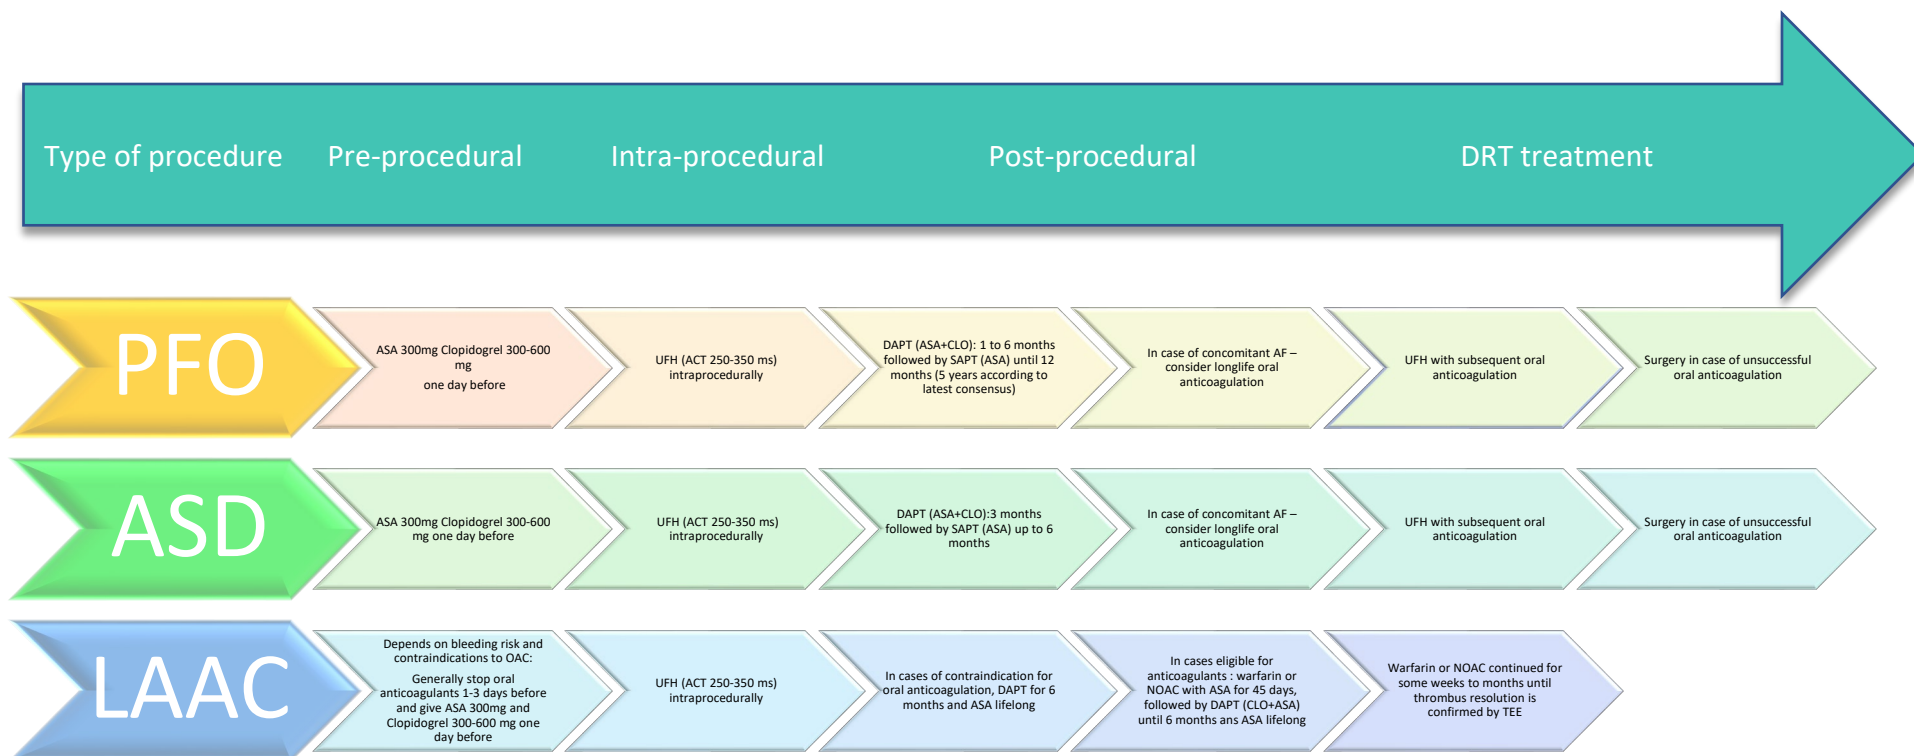

PFO/ASD persistent foramen ovale, atrial septal defect, LAAC left atrial appendage closure, DRT – device related thrombus, UFH unfractionated heparin, DAPT dual antiplatelet therapy, OAC – oral anticoagulants, NOAC novel oral anticoagulants, ASA – aspirin, CLO clopidogrel, TEE transoesophageal echocardiography

**Figure 1.** Treatment protocol in structural cardiac interventions

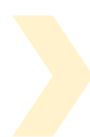

Supplement: Image_1.pdf [file Image_1.pdf]
