# Supplementary material for: Antithrombotic/Antiplatelet Treatment in Transcatheter Structural Cardiac Interventions—PFO/ASD/LAA Occluder and Interatrial Shunt Devices
Source: PubMed Central journal article supplement (PMC6568033; doi:10.3389/fcvm.2019.00075), 2019-06-07
Supplement: Table_1.pdf [file Table_1.pdf]

| <b>Study</b>                   | <b>Procedure/device</b>                                                                                          | <b>No of patients (all)</b>     | <b>No of patients with DRT or case report</b> | <b>DRT signs and/or diagnostics</b>                                                                                                 | <b>Treatment of DRT</b>                                                                                                                                                   |
|--------------------------------|------------------------------------------------------------------------------------------------------------------|---------------------------------|-----------------------------------------------|-------------------------------------------------------------------------------------------------------------------------------------|---------------------------------------------------------------------------------------------------------------------------------------------------------------------------|
| Yorgun H et al. 2011 [4]       | ASD closure / Amplatzer septal occluder                                                                          | 2                               | Case report                                   | Acute thrombus periprocedurally                                                                                                     | heparin iv and warfarin at discharge                                                                                                                                      |
| Raghu A et al. 2017 [5]        | ASD closure / Amplatzer septal occluder                                                                          | 29-year old female              | Case report                                   | Multiple cerebral, cerebellar and brain stem emboli                                                                                 | Warfarin                                                                                                                                                                  |
| Kovacevic P et al. 2017 [6]    | ASD closure / CardioSEAL-STARFlex and Amplatzer occluder                                                         | 2                               | 1 patient with DRT                            | Embolisation, massive pulmonary embolism                                                                                            | surgery, death (related to right ventricle failure;                                                                                                                       |
| Anzai H et al. 2004 [8]        | ASD or PFO closure / CardioSEAL and Amplatzer septal occluder                                                    | 66, but 50 had TEE in follow up | 5 (all related to CardioSEAL device)          | No thromboembolic events                                                                                                            | Warfarin, 1 patient - surgery                                                                                                                                             |
| Nkomo VT et al. 2001 [15]      | PFO closure / CardioSEAL                                                                                         | 2                               | Case reports                                  | Intermittent palpitations, headaches, photophobia<br>Transient episodes of blurred vision, transient episode of global amnesia, TEE | 1:Surgery,<br>2: iv heparin, warfarin, surgery                                                                                                                            |
| Krumsdorf U et al. 2004 [16]   | ASD and PFO closure/<br>Rashkind, Buttoned, ASDOS, Angel Wings, cardioSEAL, StarFLEX, Amplatzer, Helex, PFO-Star | 1000                            | 5 ASD and 15 PFO                              | 3 minor strokes, 1 TIA                                                                                                              | 1 heparin,<br>12 warfarin<br>4 heparin and warfarin<br>3 surgery (1 after unsuccessful fibrynolysis; 1 after long term warfarin; 1 sent to surgery without pre-treatment) |
| Willcoxson FE et al. 2004 [17] | ASD closure / Amplatzer septal occluder                                                                          | 12-year old male                | Case report                                   | Intraprocedural thrombus formation                                                                                                  | Abciximab and heparin, discharged with ASA and clopidogrel                                                                                                                |
| Acar P et al. 2002 [18]        | ASD closure / Amplatzer septal occluder                                                                          | 50-year-old female              | Case report                                   | Intraprocedurally                                                                                                                   | Heparin                                                                                                                                                                   |
| Chessa M et al. 2002 [19]      | ASD closure / CardioSEAL/STARFlex and Amplatzer septal occluder                                                  | 417                             | 1 patient                                     | immediately after the device delivery                                                                                               | Retrieval with a basket catheter, anticoagulant therapy for 6 months                                                                                                      |

|                                       |                                                                 |                              |             |                                                      |                                                                                                      |
|---------------------------------------|-----------------------------------------------------------------|------------------------------|-------------|------------------------------------------------------|------------------------------------------------------------------------------------------------------|
| Vanderheyden M et al. 2002 [20]       | PFO closure / PFO Starflex                                      | 46-year old female           | Case report | No symptoms, routine TEE                             | Thrombolysis (r-tpa) and tirofiban, then warfarin and clopidogrel                                    |
| Uysal F et al. 2016 [21]              | ASD closure / Amplatzer septal occluder                         | One 17-year-old patient      | Case report | Symptoms not reported, TEE                           | Surgery                                                                                              |
| Divchev D et al. 2007 [22]            | ASD closure/ StarFLEX                                           | 69-year-old female           | Case report | No symptoms, planned TEE                             | Surgery                                                                                              |
| Main ML et al. 2016 [24]              | LAAC / Watchman                                                 | 485                          | 27          | Planned TEE<br>Stroke, death                         | Not reported                                                                                         |
| Pracon R et al. 2018 [33]             | LAAC / Watchman and Amplatzer Cardiac Plug/Amulet               | 102                          | 7           | 1 stroke                                             | ASA+LMWH<br>DAPT+LMWH<br>LMWH/OAC+DAPT<br>ASA+clopidogrel                                            |
| Chun KRJ et al. 2013 [34]             | LAAC / Watchman and Amplatzer Cardiac Plug                      | 80                           | 4           | Planned TEE                                          | Patients on DAPT - additional subcutaneous enoxaparin<br>Patients on OAC - intensified phenprocoumon |
| Plicht B et al. 2013 [35]             | LAAC / Amplatzer Cardiac Plug                                   | 34                           | 6           | Planned TEE<br>No strokes occurred                   | Iv heparin or VKA                                                                                    |
| Fauchier L et al. 2018 [41]           | LAAC / Watchman and Amplatzer Cardiac Plug and Amplatzer Amulet | 469                          | 26          | 4 strokes<br>Planned TEE and CT                      | OAC                                                                                                  |
| Lempereur M et al. 2017 – review [42] | LAAC / Watchman and Amplatzer Cardiac Plug and Amplatzer Amulet | Review of 30 studies<br>2118 | 82          | TEE<br>Neurological events – TIA (2) and strokes (4) | LMWH<br>OAC<br>DAPT, SAPT<br>Unknown                                                                 |
| Dukkipati SR et al. 2018 [44]         | LAAC / Watchman                                                 | 1739                         | 65          | 16 patients had stroke or systemic embolism          | Not reported                                                                                         |
| Ketterer U et al. 2016 [45]           | LAAC / Watchman                                                 | 46                           | 4           | Planned TEE                                          | Phenprocoumon in 1 patient<br>Apixaban in 3 patients                                                 |
| Sedaghat A et al. 2017 [46]           | LAAC / Amplatzer Amulet Device                                  | 24                           | 4           | TEE<br>1 TIA                                         | Apixaban, edoxaban, dabigatran                                                                       |

|                                            |                                        |    |             |                                                                |                                                                                                          |
|--------------------------------------------|----------------------------------------|----|-------------|----------------------------------------------------------------|----------------------------------------------------------------------------------------------------------|
| Kaneko H et al. 2017 [47]                  | LAAC / Watchman                        | 78 | 4           | Planned TEE                                                    | Not reported                                                                                             |
| Lam SC et al. 2015 [50]                    | LAAC / Watchman                        | 1  | Case report | TEE in observation                                             | Warfarin and subsequent second device (Amplatzer Cardiac Plug) implantation                              |
| Qazi AH et al. 2016 [52]                   | LAAC / Watchman                        | 1  | Case report | TEE in observation                                             | DRT resolution on dabigatran, recurrence of DRT after completing dabigatran, introduction of rivaroxaban |
| Feldman T et al. 2018 REDUCE LAP-HF I [54] | Transcatheter Interatrial Shunt Device | 94 | 1           | Intraprocedurally – thrombus on the tip of the delivery system | Delivery system was removed and exchanged                                                                |

Table 1. Summary of published reports of thrombus formation
